# Supplementary material for: Association between fetal sex and maternal plasma microRNA responses to prenatal alcohol exposure: evidence from a birth outcome-stratified cohort
Source: PubMed Central journal article supplement (PMC7488011; doi:10.1186/s13293-020-00327-2), 2020-09-10

All Samples-2nd trimester

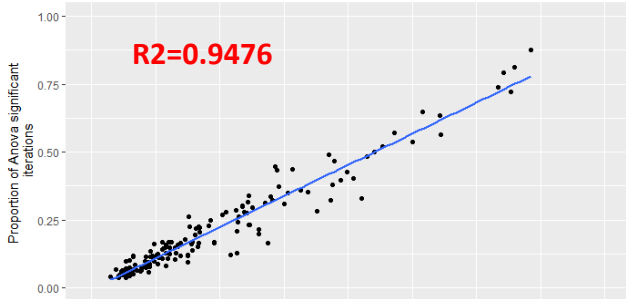

All Samples-3rd trimester

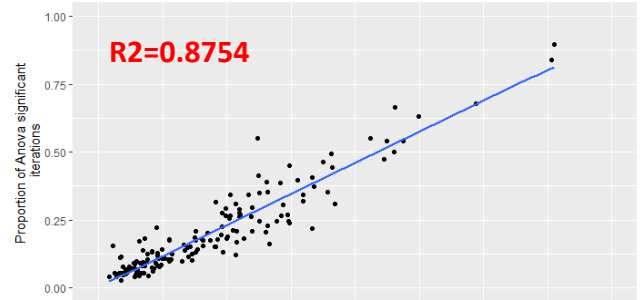

Male Samples-2nd trimester

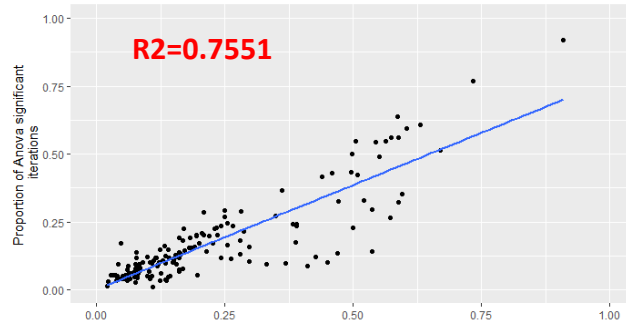

Male Samples-3rd trimester

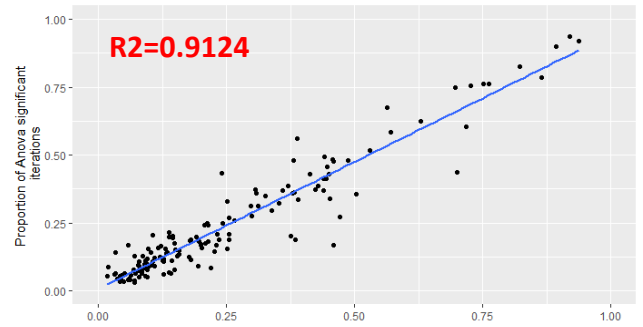

Female Samples-2nd trimester

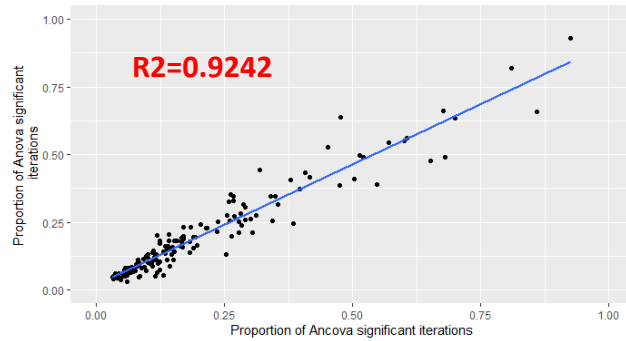

Female Samples-3rd trimester

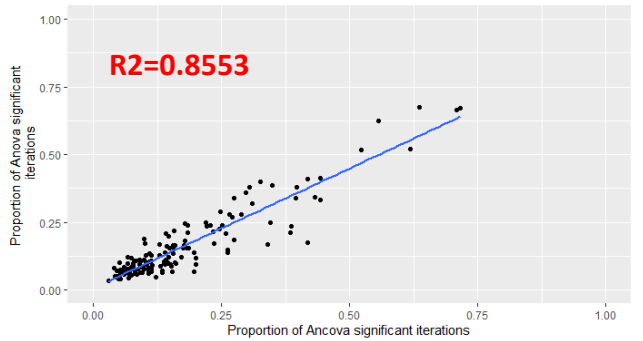

Supplement: 13293_2020_327_MOESM3_ESM.pdf [file 13293_2020_327_MOESM3_ESM.pdf]
