# Supplementary material for: Association between fetal sex and maternal plasma microRNA responses to prenatal alcohol exposure: evidence from a birth outcome-stratified cohort
Source: PubMed Central journal article supplement (PMC7488011; doi:10.1186/s13293-020-00327-2), 2020-09-10
Supplement: 13293_2020_327_MOESM4_ESM.pdf [file 13293_2020_327_MOESM4_ESM.pdf]

# HEua vs. UE

2<sup>nd</sup> Trimester

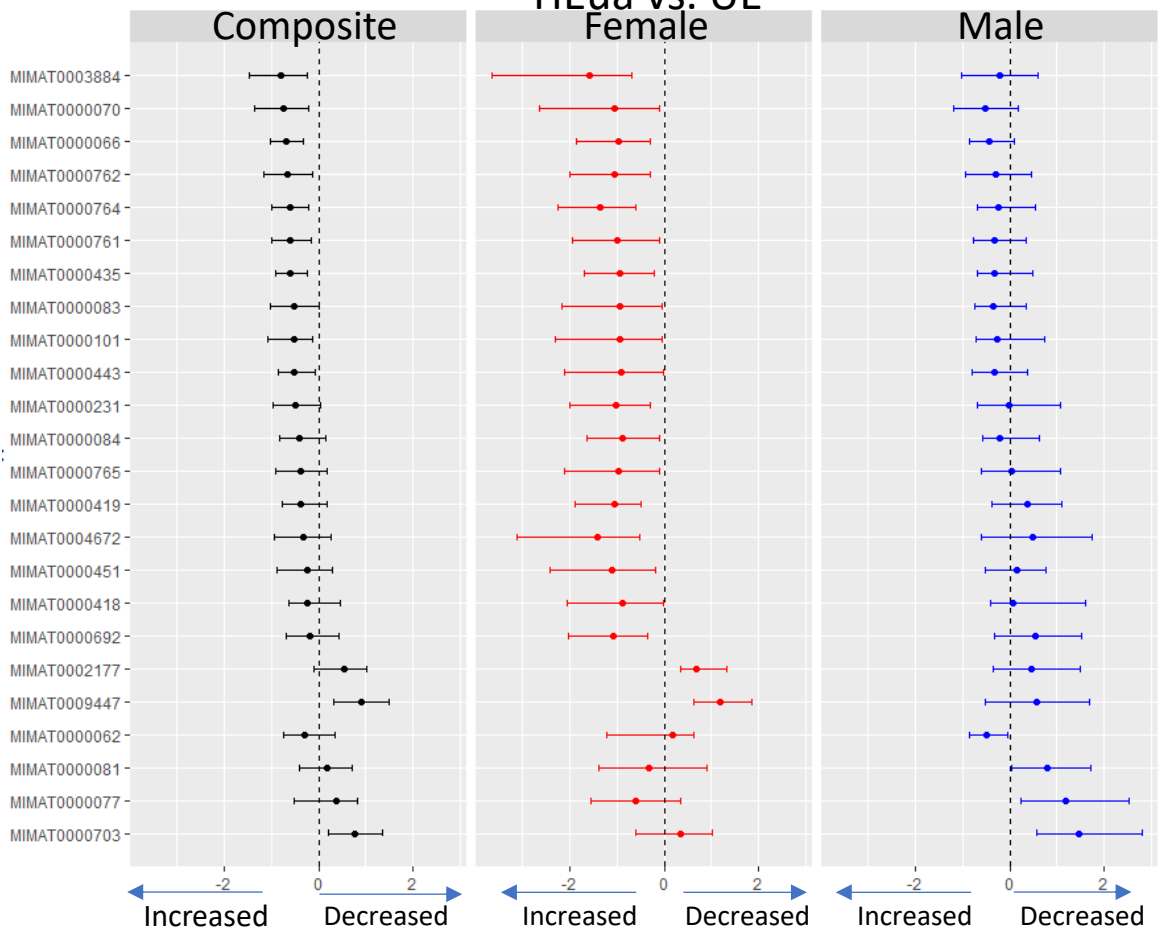

3<sup>rd</sup> Trimester

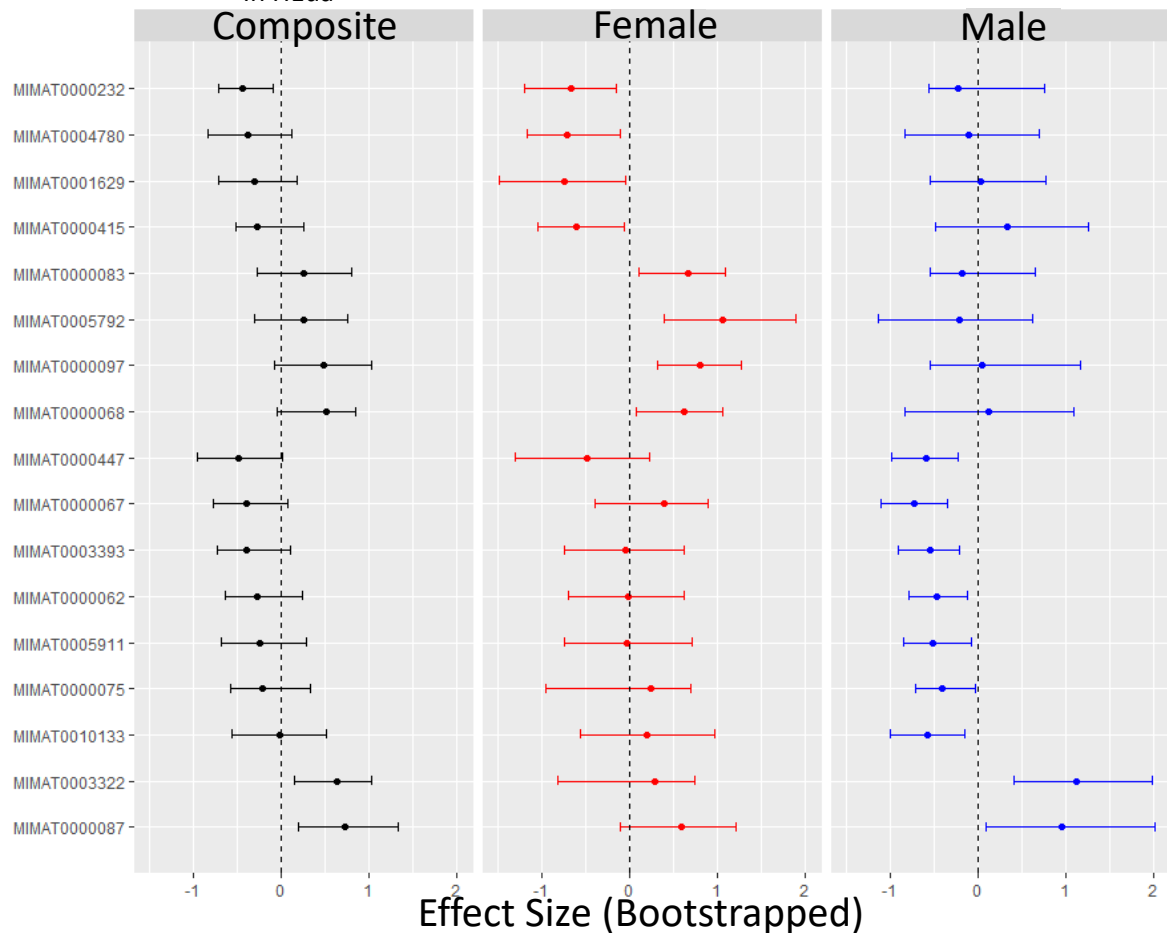

Effect Size (Bootstrapped)
